# Supplementary material for: Improved prediction of MHC-peptide binding using protein language models
Source: PubMed Central journal article supplement (PMC10469926; doi:10.3389/fbinf.2023.1207380), 2023-08-17
Supplement: Table1.pdf [file Table1.pdf]

# Supplementary Material

## 1 SUPPLEMENTARY TABLES AND FIGURES

### 1.1 Figures

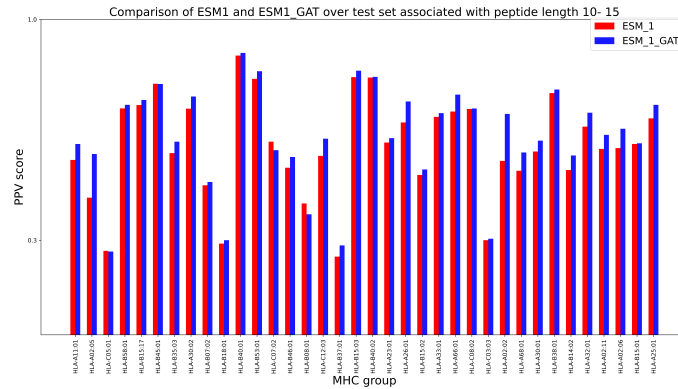

**Figure S1.** PPV Comparison (hit-decoy ratio: 19) of ESM fine-tuning method versus ESM-GAT over the training set with peptide length 8 and 9 and test set with peptide length 10 to 14.

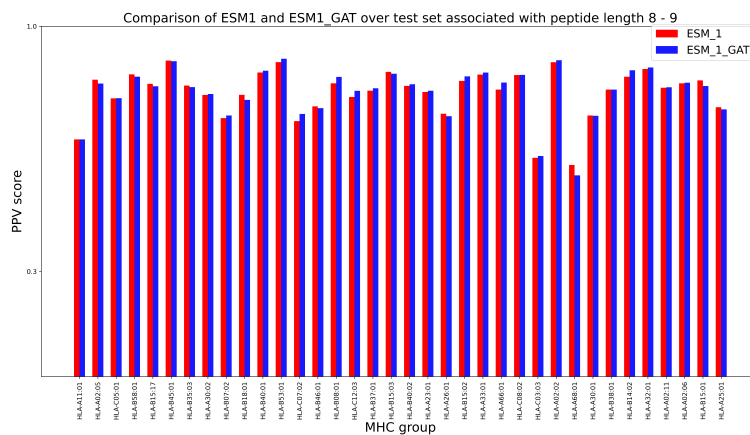

**Figure S2.** PPV Comparison (hit-decoy ratio: 19) of ESM fine-tuning method versus ESM-GAT over the training set with peptide length 8 and 9 and test set with peptide length 8 and 9..

Table S1. Independent EL SA test set provided by NetMHCpan 4.1

| MHC        | # Peptides | # Positives | # Negatives |
|------------|------------|-------------|-------------|
| HLA-A02:02 | 77053      | 3063        | 73990       |
| HLA-A02:05 | 45136      | 2016        | 43120       |
| HLA-A02:06 | 54510      | 1975        | 52535       |
| HLA-A02:11 | 48445      | 2035        | 46410       |
| HLA-A11:01 | 33424      | 2309        | 31115       |
| HLA-A23:01 | 30467      | 1697        | 28770       |
| HLA-A25:01 | 6906       | 396         | 6510        |
| HLA-A26:01 | 7730       | 555         | 7175        |
| HLA-A30:01 | 15837      | 892         | 14945       |
| HLA-A30:02 | 33180      | 2415        | 30765       |
| HLA-A32:01 | 28036      | 1436        | 26600       |
| HLA-A33:01 | 43333      | 2138        | 41195       |
| HLA-A66:01 | 41538      | 1988        | 39550       |
| HLA-A68:01 | 5648       | 433         | 5215        |
| HLA-B07:02 | 2469       | 159         | 2310        |
| HLA-B08:01 | 3365       | 180         | 3185        |
| HLA-B14:02 | 21601      | 1056        | 20545       |
| HLA-B15:01 | 16624      | 769         | 15855       |
| HLA-B15:02 | 16702      | 637         | 16065       |
| HLA-B15:03 | 44968      | 1953        | 43015       |
| HLA-B15:17 | 45917      | 1712        | 44205       |
| HLA-B18:01 | 18284      | 784         | 17500       |
| HLA-B35:03 | 8275       | 330         | 7945        |
| HLA-B37:01 | 20048      | 1253        | 18795       |
| HLA-B38:01 | 9509       | 619         | 8890        |
| HLA-B40:01 | 18908      | 1268        | 17640       |
| HLA-B40:02 | 23768      | 1333        | 22435       |
| HLA-B45:01 | 18750      | 760         | 17990       |
| HLA-B46:01 | 14015      | 575         | 13440       |
| HLA-B53:01 | 46991      | 2016        | 44975       |
| HLA-B58:01 | 17946      | 866         | 17080       |
| HLA-C03:03 | 35568      | 2003        | 33565       |
| HLA-C05:01 | 7033       | 383         | 6650        |
| HLA-C07:02 | 15293      | 593         | 14700       |
| HLA-C08:02 | 32416      | 1546        | 30870       |
| HLA-C12:03 | 36448      | 1273        | 35175       |
